# Supplementary material for: NiFe nanoparticles supported on N-doped graphene hollow spheres entangled with self-grown N-doped carbon nanotubes for liquid electrolyte/flexible all-solid-state rechargeable zinc–air batteries
Source: Royal Society of Chemistry journal article supplement (doi:10.1039/d2ta03110h), 2022-01-01
Supplement: d2ta03110h1.pdf [file d2ta03110h1.pdf]

## Supporting information

### **NiFe-nanoparticles supported N-doped graphene hollow spheres entangled with self-grown N-doped carbon nanotubes for liquid electrolyte/flexible all-solid-state rechargeable zinc-air batteries**

Yefei Ma,<sup>a,b,+</sup> Weiheng Chen,<sup>c,+</sup> Zhongqing Jiang,<sup>\*a</sup> Xiaoning Tian,<sup>\*b</sup> Xinyi  
WangGuo,<sup>b</sup> Guangliang Chen<sup>d</sup> and Zhong-Jie Jiang<sup>\*c</sup>

<sup>a</sup> Key Laboratory of Optical Field Manipulation of Zhejiang Province, Department of Physics, Zhejiang Sci-Tech University, Hangzhou 310018, P.R. China. E-mail: zhongqingjiang@hotmail.com or zhongqingjiang@zstu.edu.cn

<sup>b</sup> Department of Materials and Chemical Engineering, Ningbo University of Technology, Ningbo 315211, P.R. China. E-mail: boxertxn@hotmail.com

<sup>c</sup> Vehicle Energy and Safety Laboratory, Department of Mechanical Engineering, Ningbo University of Technology, Ningbo 315336, P.R. China.

<sup>d</sup> School of Materials Science and Engineering, Zhejiang Sci-Tech University, Hangzhou 310018, P.R. China.

<sup>e</sup> Guangdong Engineering and Technology Research Center for Surface Chemistry of Energy Materials & Guangzhou Key Laboratory for Surface Chemistry of Energy Materials, New Energy Research Institute, College of Environment and Energy, South China University of Technology, Guangzhou 510006, P.R. China. Email: eszjiang@scut.edu.cn or zhongjiejiang1978@hotmail.com

<sup>+</sup>These authors contributed equally.

**This PDF file includes:**

**Experimental Section**

**Fig. S1 to S13**

**Tables S1-S7**

## 1. Experimental section

### 1.1. Reagents and materials

Flake graphite (325 meshes) was bought from Alfa Ltd. Concentrated sulfuric acid ( $\text{H}_2\text{SO}_4$ , 96.0%), sodium nitrate ( $\text{NaNO}_3$ ,  $\geq 99.0\%$ ), hydrochloric acid ( $\text{HCl}$ , 37.0%), potassium hydroxide ( $\text{KOH}$ ,  $\geq 85.0\%$ ), potassium permanganate ( $\text{KMnO}_4$ ,  $\geq 99.5\%$ ), hydrogen peroxide aqueous solution ( $\text{H}_2\text{O}_2$ , 30.0%), 2,2'-Azobis (2-methylpropionamide)dihydrochloride (97.0%), polyvinyl pyrrolidone (K-30), styrene ( $\text{C}_8\text{H}_8$ ,  $\geq 99.5\%$ ), melamine ( $\text{C}_3\text{H}_6\text{N}_6$ ,  $\geq 99.0\%$ ), 2-methylimidazole ( $\text{C}_4\text{H}_6\text{N}_2$ , 98%), nickel(II) nitrate hexahydrate ( $\text{Ni}(\text{NO}_3)_2 \cdot 6\text{H}_2\text{O}$ ),  $\geq 98.0\%$ ), iron(III) nitrate nonahydrate ( $\text{Fe}(\text{NO}_3)_3 \cdot 9\text{H}_2\text{O}$ ,  $\geq 98.5\%$ ), zinc acetate ( $\text{Zn}(\text{Ac})_2$ ,  $\geq 99.0\%$ ), polyvinyl alcohol (PVA, 99.0%), and isopropanol ( $\text{CH}_3\text{CH}(\text{OH})\text{CH}_3$ ,  $\geq 99.7\%$ ) were bought from Shanghai Chemical Reagent Co. Ltd. Carbon paper (CP), Carbon cloth, commercial 20% Pt/C were purchased from Shanghai Hesen Electric Co., Ltd. (Shanghai, China).  $\text{RuO}_2$  (99.9%) and Zinc foil (99.994%) was purchased from Alfa Aesar. Nafion (5.0 wt.%) was purchased from DuPont Company. All the chemicals were used as received without further purification.

### 1.2. Preparation of polystyrene spheres (PS)

The positively charged polystyrene spheres (PS) were prepared by the emulsifier-free polymerization method described previously.<sup>1</sup> 13.0 mL styrene monomer and 1.5 g polyvinyl pyrrolidone (PVP) were dissolved in 100 mL of deionized (DI) water. The mixture was stirred for 30 min at room temperature under the protection of nitrogen. Then, 0.26 g 2,2'-Azobis (2-methylpropionamide) dihydrochloride (AIBA) solution was added to the above-mentioned mixture under stirring and the protection of nitrogen for 1 h, which was dissolved in 20 mL DI water. Then, the reaction temperature was raised to 70 °C, and the reaction was kept under  $\text{N}_2$  protection condition for 24 h.

### 1.3. Materials characterizations

The morphologies of obtained samples were characterized using field emission scanning electron microscopy (S-4800, Hitachi) with an operation voltage of 20.0 kV.

Transmission electron microscopy (TEM) and high-resolution TEM (HRTEM) were performed on JEM 2010, JEOL, Japan at an accelerate voltage of 200 kV. The structure analysis was carried out by Bruker D8 Advance X-ray powder diffractometer using Cu K $\alpha$  radiation ( $\lambda = 1.5406$  nm) from 5° to 85° at a scan rate of 2° min<sup>-1</sup>, which operated at voltage 40 kV, current 30 mA. The Brunauer-Emmett-Teller (BET) specific surface area and porosity of obtained samples were detected by Quantachrome, Autosorb-IQ-MP instrument. The composition and chemical states were determined by X-ray photoelectron spectroscopy (XPS) on Thermo VG Scientific ESCALAB 250 spectrometers with Al K $\alpha$  radiation source (1486 eV). The thermogravimetric analysis (TGA Netzsch, TG209 F3) was operated in air at a heating rate of 5°C min<sup>-1</sup> from 30°C to 800°C.

#### *1.4. Electrochemical measurements*

All the electrochemical measurements were conducted at room temperature (25 °C) using CHI 760E electrochemical workstation (Shanghai Chenhua Co., China). The conventional three-electrode system was employed, including the polished glassy carbon rotating disk electrode (GC, 0.19625 cm<sup>2</sup>) loaded with the required catalysts as the working electrode, the saturated calomel electrode (SCE) as the reference electrode, and a Pt wire as the auxiliary electrode, respectively. The electrocatalyst inks were prepared by ultrasonically dispersing 4 mg acquired sample in mixture solution containing 652  $\mu$ L deionized water, 87  $\mu$ L 5 wt% Nafion, and 261  $\mu$ L isopropanol. 10  $\mu$ L dispersed ink was coated onto the GC electrode with a mass loading  $\sim$ 0.2 mg cm<sup>-2</sup> for catalyst, then dried in air. All measured potentials were reported versus the standard reversible hydrogen electrode (RHE), and for conversion of the tested potential (vs. SCE):

$$E(\text{RHE}) = E(\text{SCE}) + 0.059pH + 0.2415$$

All the OER tests were subsequently tested in 0.1 M KOH solution. The OER linear polarization curves (LSVs) were recorded at scan rate 5 mV s<sup>-1</sup> ranged between approximately 1.1 and 1.9 V vs. RHE and the data were 80% IR compensated. According to the polarization curves, the Tafel slopes were calculated using the Tafel

equation as follows:  $\eta = a + b \log(j)$ , where  $\eta$ ,  $a$ ,  $b$  and  $j$  are the overpotential, Tafel constant, Tafel slope and measured current density, respectively. The overpotential ( $\eta$ ) were measured as follows:  $\eta$  (V) = E (vs. RHE)-1.23 V. The electrochemical impedance spectroscopy (EIS) measurements were conducted at 1.60 V (vs. RHE) in the frequency range of 0.01-100000 Hz. Furthermore, the OER durability was evaluated by chronopotentiometric measurements at 10 mA cm<sup>-2</sup> in 0.1 M KOH electrolyte. Commercial RuO<sub>2</sub> catalyst were also measured for comparison.

All the measurements were carried out in 0.1 M KOH solution for ORR performances. The 0.1 M KOH was bubbled with N<sub>2</sub> or O<sub>2</sub> for at least an hour before cyclic voltammetry (CV) tests, and CV curves were tested at a scan rate of 10 mV s<sup>-1</sup>. The electrochemical impedance spectroscopy (EIS) was measured at -0.19 V (vs. SCE) with the frequency range from 100000 Hz to 0.01 Hz.

The LSVs were performed at various rotation speeds (i.e., 400, 625, 900, 1225, 1600 and 2025 rpm) due to the diffusion-controlled oxygen reduction reaction (ORR). The kinetic current density and the number of electrons transferred ( $n$ ) could be calculated from Koutecky-Levich (K-L) plots as the following equation:<sup>2</sup>

$$\frac{1}{j} = \frac{1}{j_L} + \frac{1}{j_K} = \frac{1}{(B\omega^{1/2})} + \frac{1}{j_K} \quad (S1)$$

$$B = 0.62nFC_0D_0^{2/3}\nu^{-1/6} \quad (S2)$$

$$j_K = nFkC_0 \quad (S3)$$

where  $J$ ,  $J_k$  and  $J_L$  are the measuring current density, kinetic current density and diffusion limited current density, respectively, while other parameters explain as follows: the reciprocal slope ( $B$ ), the angular velocity of electrode rotation ( $\omega$ ), the electron transferred number ( $n$ ), the Faraday constant  $F$  (96485 C mol<sup>-1</sup>), the saturated concentration of O<sub>2</sub> ( $C_0$ ) in 0.1 M KOH ( $1.2 \times 10^{-3}$  mol L<sup>-1</sup>), the diffusion coefficient of O<sub>2</sub> ( $D_0$ ) in 0.1 M KOH ( $1.90 \times 10^{-5}$  cm<sup>2</sup> s<sup>-1</sup>), the kinetic viscosity of 0.1 M KOH ( $\nu$ ) (0.01 cm<sup>2</sup> s<sup>-1</sup>), and the electron transfer rate constant ( $\kappa$ ).

RRDE voltammetry were performed at 1600 rpm with a scan speed of 5 mV s<sup>-1</sup>, and the potential of Pt ring electrode was held at 1.3 V (vs. RHE). The electron transfer number ( $n$ ) and the hydrogen peroxide yield (H<sub>2</sub>O<sub>2</sub>%) per oxygen molecule

can be calculated by the following equations:

$$n = \frac{4I_D}{I_D + I_{R/N}} \quad (\text{S4})$$

$$H_2O_2\% = 200 \frac{I_{R/N}}{I_D + I_{R/N}} \quad (\text{S5})$$

where  $I_D$ ,  $I_R$  and  $N$  stand for the disk current, the ring current and ring collection efficiency of RRDE, respectively. In this measurement,  $N=0.4$ .

For the Tafel plot, the kinetic current density measured at a rate of  $5 \text{ mV s}^{-1}$  with a rotating speed from 1600 rpm was calculated from the mass-transport correction of the RDE data by:

$$J_K = \frac{J \times J_L}{(J_L - J)} \quad (\text{S6})$$

The corresponding bifunctional activity parameter was evaluated by  $\Delta E$  using the following equation:

$$\Delta E = E_{OER, J=10} - E_{1/2} \quad (\text{S7})$$

where  $E_{OER, J=10}$  and  $E_{1/2}$  are the potential at  $10 \text{ mA cm}^{-2}$  for OER and half of  $J_L$  for ORR, respectively.

The ORR stabilities were examined by chronoamperometry method at constant potential of  $-0.19 \text{ V}$  (vs. SCE) for 10000 s. Furthermore, the poisoning durabilities were performed by the addition of CO and methanol. For comparison, the commercial 20% Pt/C catalysts were operated with the same procedure.

### 1.5. DFT calculation

First-principles density functional theory (DFT) calculations were carried out using the Vienna Ab Initio Simulation Package (VASP). Geometries were optimized, and the total energies and forces were calculated using a planewave basis set with the projector augmented wave (PAW) method. The generalized gradient approximation (GGA) with the Perdew–Burke–Ernzerhof (PBE) exchange-correlation functional was used, and the planewave cutoff energy was set to  $500 \text{ eV}$ . All structures were optimized such that the total energy converged to less than  $1 \times 10^{-6} \text{ eV}$  per atom and the maximum force converged to below  $-0.01 \text{ eV \AA}^{-1}$ . Brillouin-zone integrations were carried out using a  $5 \times 1 \times 1$  Monkhorst–Pack K-point grid. All calculations were

performed using spin restricted method. The dipole correction and Van der Waals correction method was not considered, because they have little influence on the comparison of models' energy in our system.

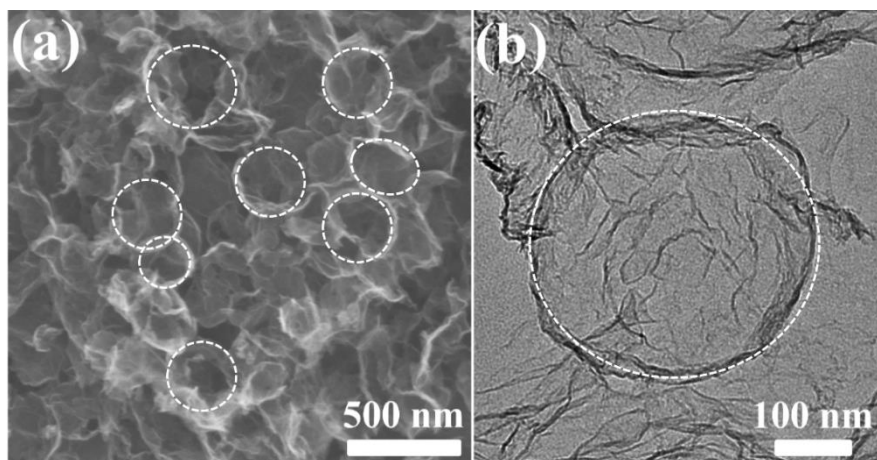

**Fig. S1.** (a) SEM and (b) TEM images of NGHS. The formed hollow spheres were marked with white circles.

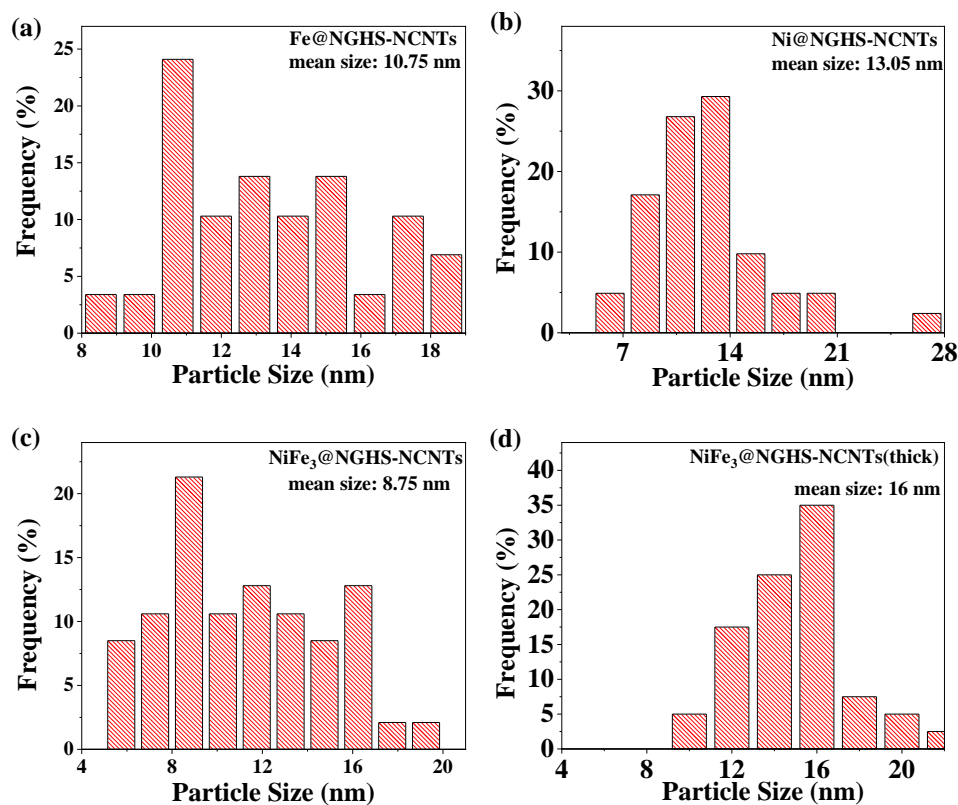

**Fig. S2.** The particle size distribution diagrams of (a) Fe@NGHS-NCNTs, (b) Ni@NGHS-NCNTs, (c) NiFe<sub>3</sub>@NGHS-NCNTs, and (d) NiFe<sub>3</sub>@NGHS-NCNTs(thick).

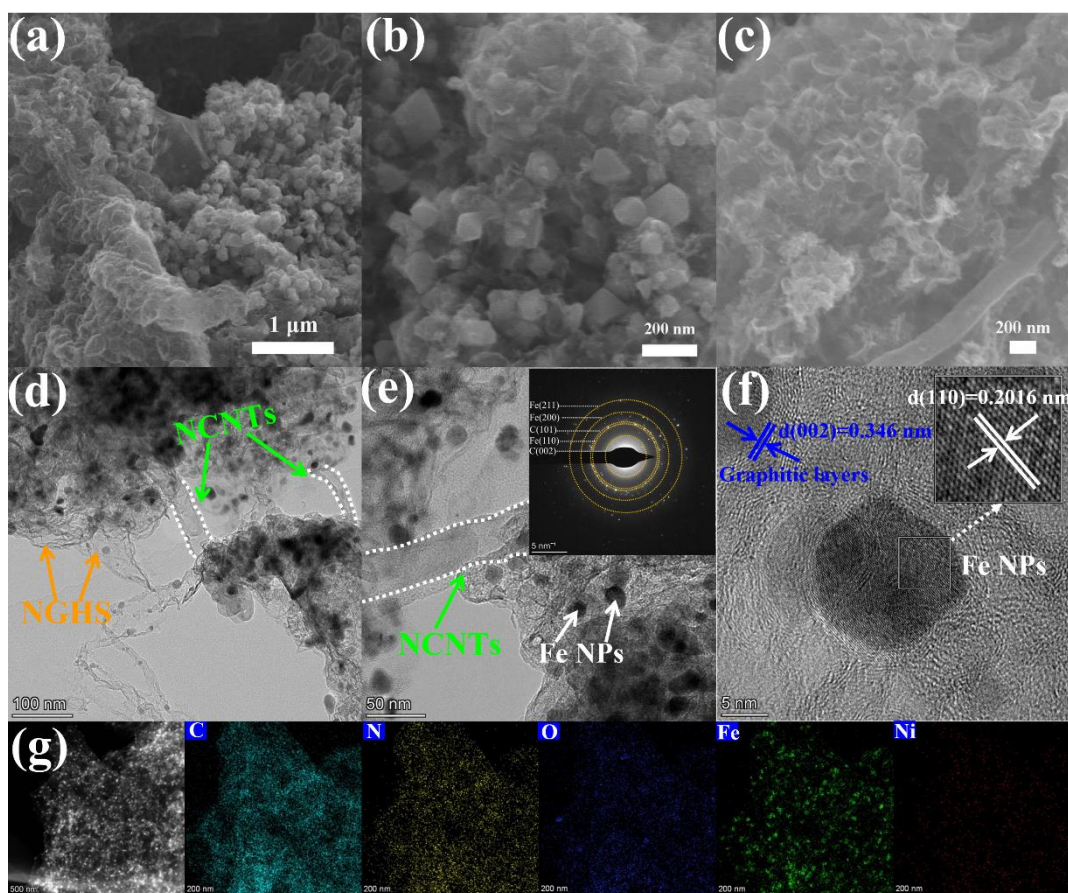

**Fig. S3.** SEM images of (a, b, c) NiFe<sub>3</sub>@NGHS-NCNTs(thick). TEM and HRTEM images of (d, e, f) NiFe<sub>3</sub>@NGHS-NCNTs(thick). (g) EDS elemental mapping images of NiFe<sub>3</sub>@NGHS-NCNTs(thick). The inset in (e) shows the SAED pattern of NiFe<sub>3</sub>@NGHS-NCNTs(thick).

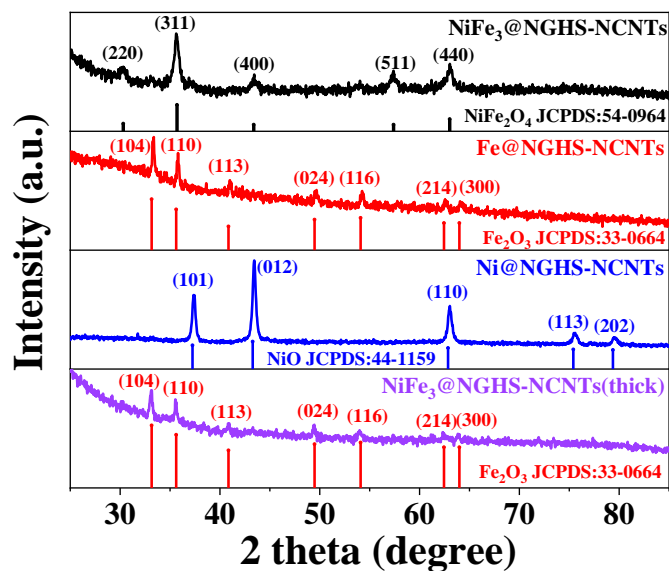

**Fig. S4.** XRD patterns of NiFe<sub>3</sub>@NGHS-NCNTs, Fe@NGHS-NCNTs, Ni@NGHS-NCNTs, and NiFe<sub>3</sub>@NGHS-NCNTs(thick) after calcinated at 800°C in air.

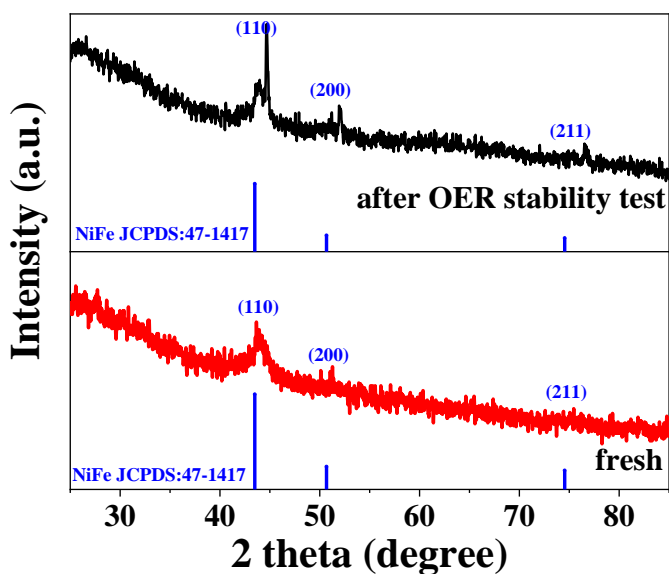

**Fig. S5.** XRD pattern of NiFe<sub>3</sub>@NGHS-NCNTs and NiFe<sub>3</sub>@NGHS-NCNTs after OER stability test.



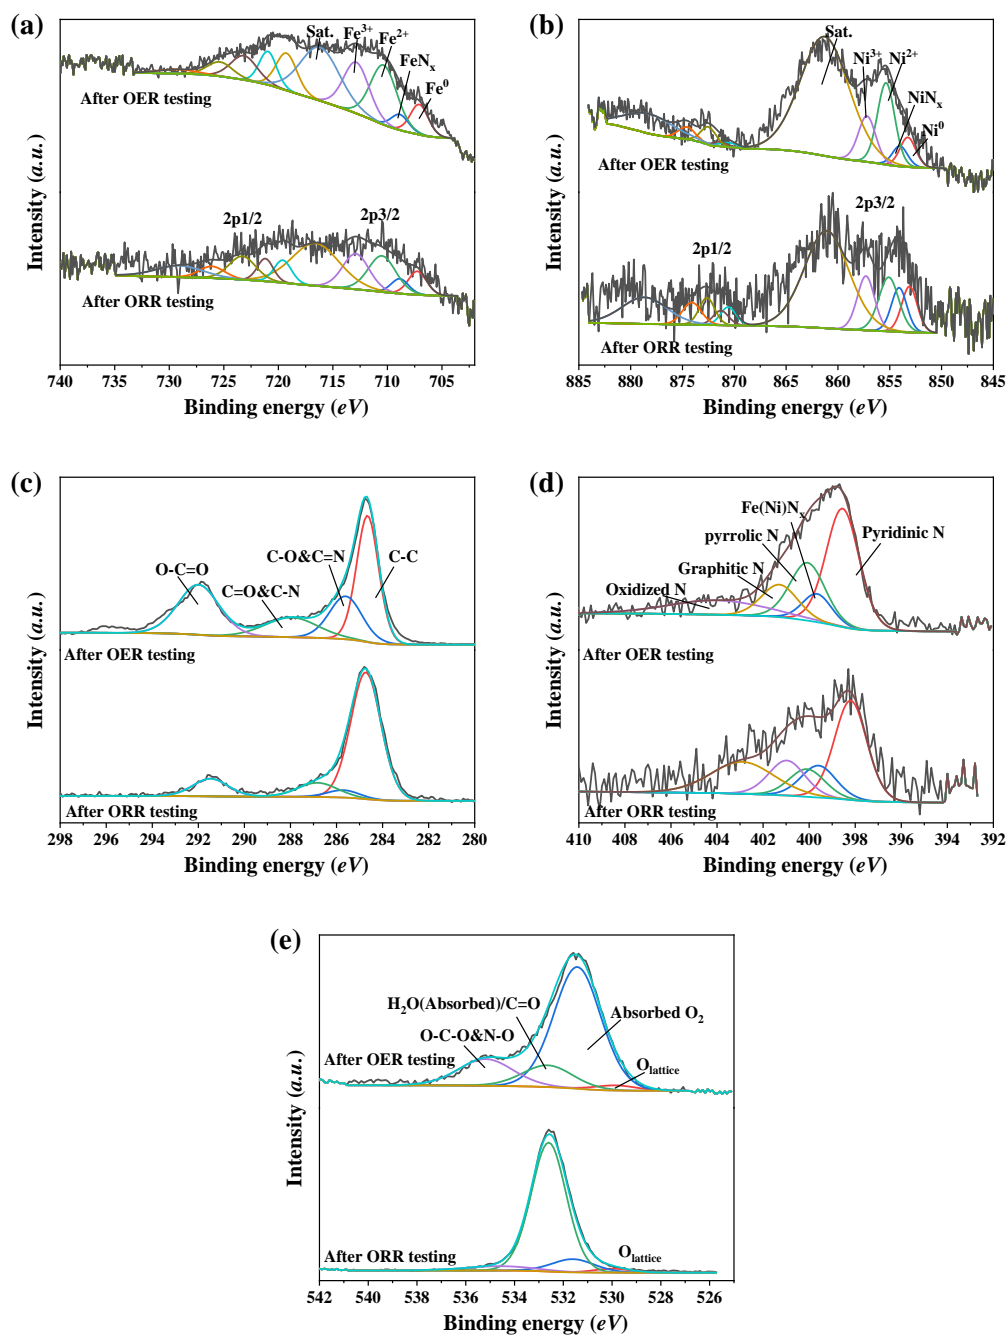

**Fig. S6.** (a) High-resolution Fe 2p spectra; (b) High-resolution Ni 2p spectra; (c) C 1s, (d) N 1s and (e) O 1s spectra of NiFe<sub>3</sub>@NGHS-NCNTs after ORR and OER stabilities test.

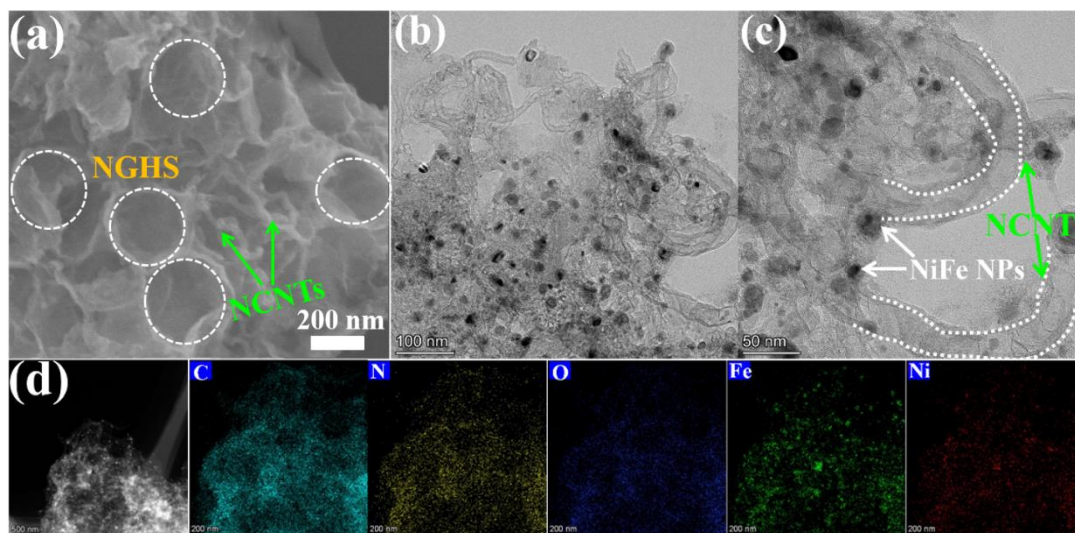

**Fig. S7.** SEM image (a), TEM images (b, c) and element mapping images (d) of  $\text{NiFe}_3@$ NGHS-NCNTs after OER stability test. The formed hollow spheres were marked with white circles.

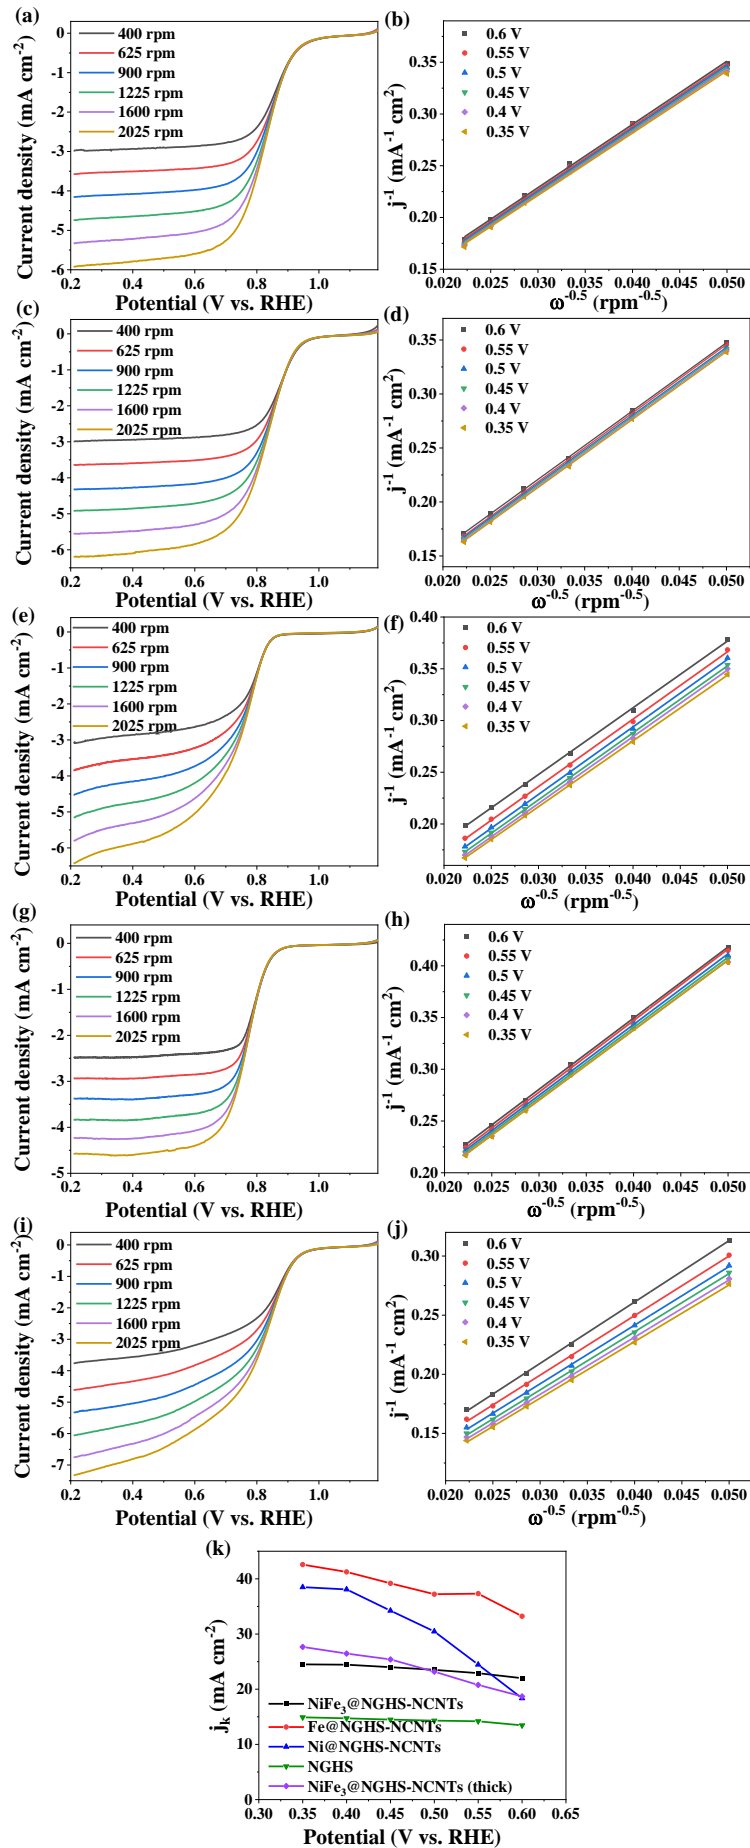

**Fig. S8.** Rotating disk electrode LSVs of NiFe<sub>3</sub>@NGHS-NCNTs (a), Fe@NGHS-NCNTs (c), Ni@NGHS-NCNTs (e), NGHS (g) and NiFe<sub>3</sub>@NGHS-NCNTs(thick) (i) in O<sub>2</sub>-saturated 0.1 M KOH at different rotation rates (scan rate: 5 mV s<sup>-1</sup>); Koutecky-Levich plots of ORR obtained at NiFe<sub>3</sub>@NGHS-NCNTs (b), Fe@NGHS-NCNTs (d), Ni@NGHS-NCNTs (f), NGHS (h) and NiFe<sub>3</sub>@NGHS-NCNTs (thick) (i) based on the data extracted from (a, c, e, g, i); (k) kinetic current densities.

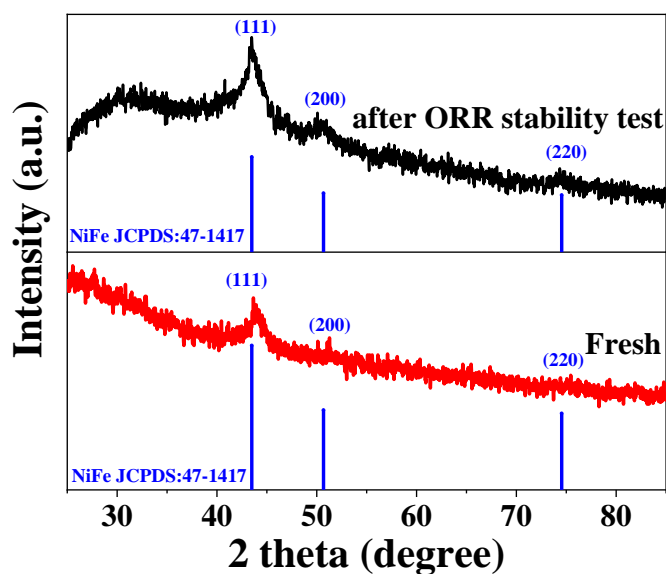

**Fig. S9.** XRD patterns of NiFe<sub>3</sub>@NGHS-NCNTs before and after ORR stability test.

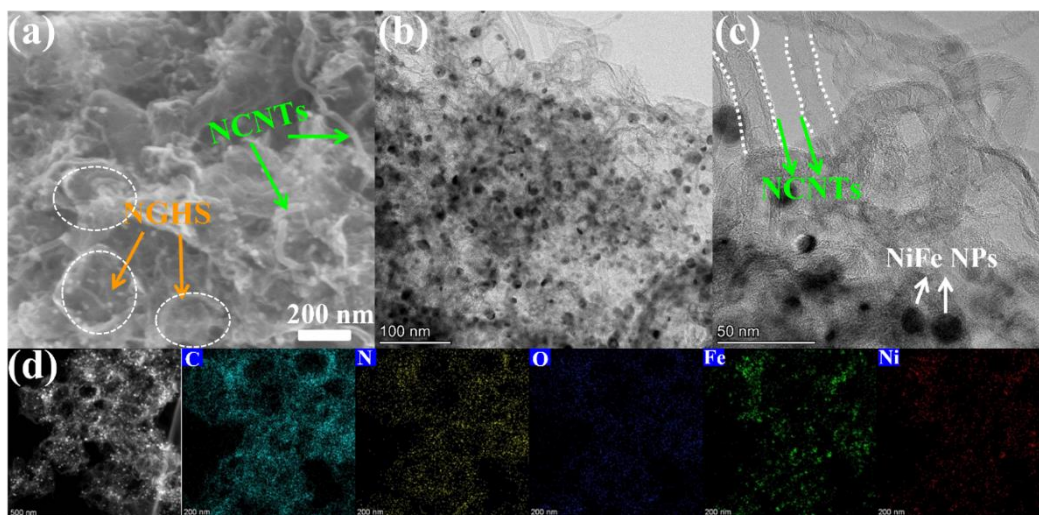

**Fig. S10.** SEM image (a), TEM images (b, c), and element mapping images (d) of NiFe<sub>3</sub>@NGHS-NCNTs after ORR stability test. The formed hollow spheres were marked with white circles.

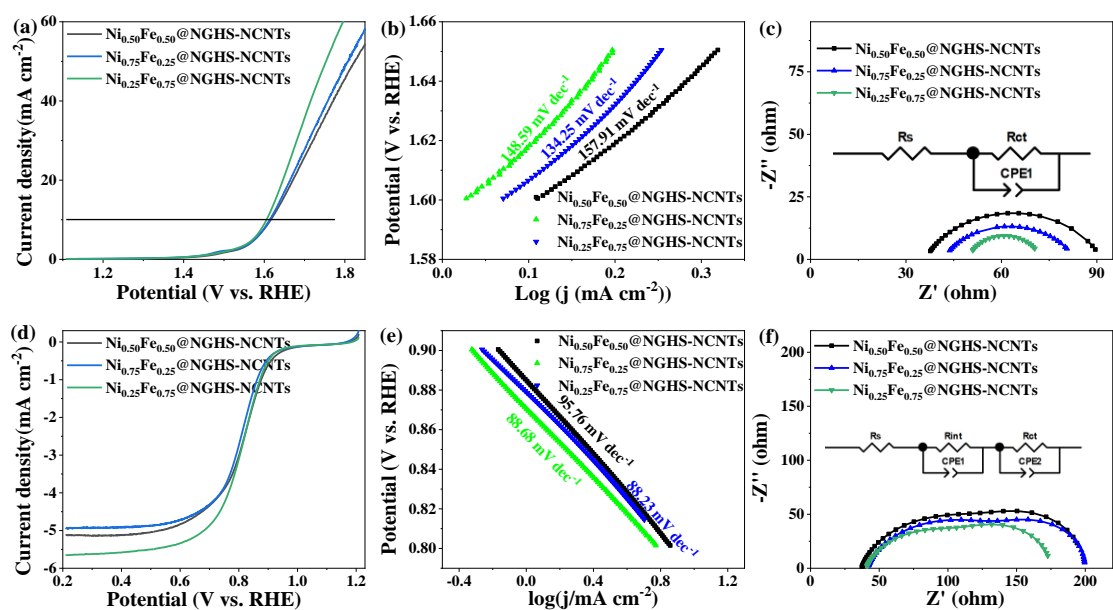

**Fig. S11.** OER performances: (a) OER polarization LSV curves, (b) Tafel curves, (c) EIS Nyquist plots. ORR performances: (d) ORR polarization LSV curves, (e) Tafel curves, (f) EIS Nyquist plots of NiFe@NGHS-NCNTs prepared in different intermetallic molar ratios, maintaining other parameters such as total metal loading of 1 mmol and calcination temperature of 800 °C.

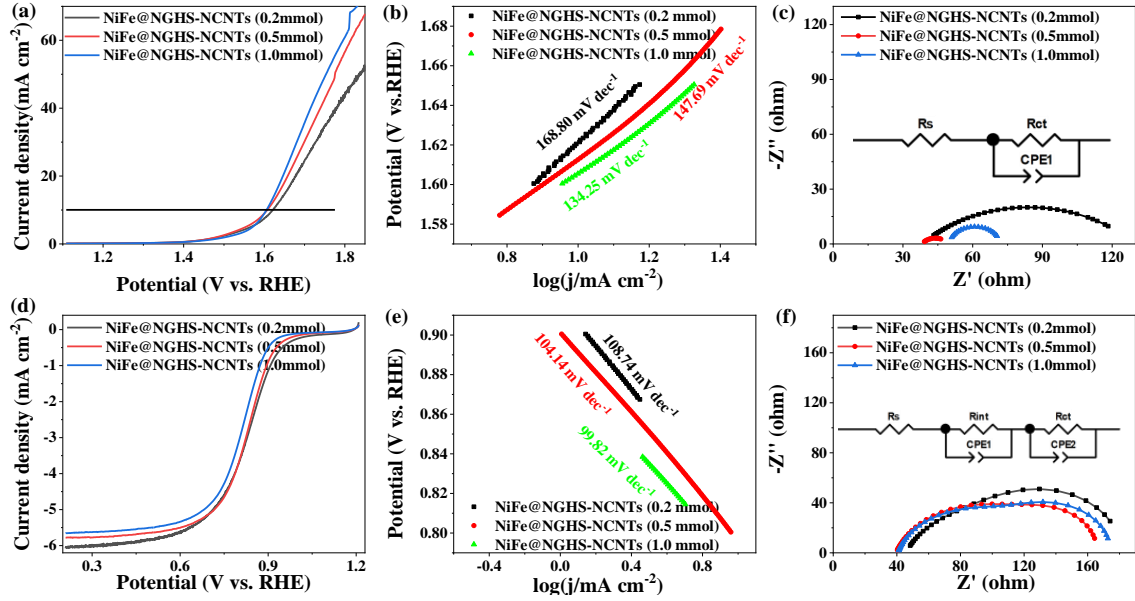

**Fig. S12.** OER performances: (a) OER polarization LSV curves, (b) Tafel curves, (c) EIS Nyquist plots. ORR performances: (d) ORR polarization LSV curves, (e) Tafel curves, (f) EIS Nyquist plots of NiFe@NGHS-NCNTs prepared at different alloy loadings, maintaining other parameters such as intermetallic molar ratio of 1:3 (Ni : Fe) and calcination temperature of 800 °C.

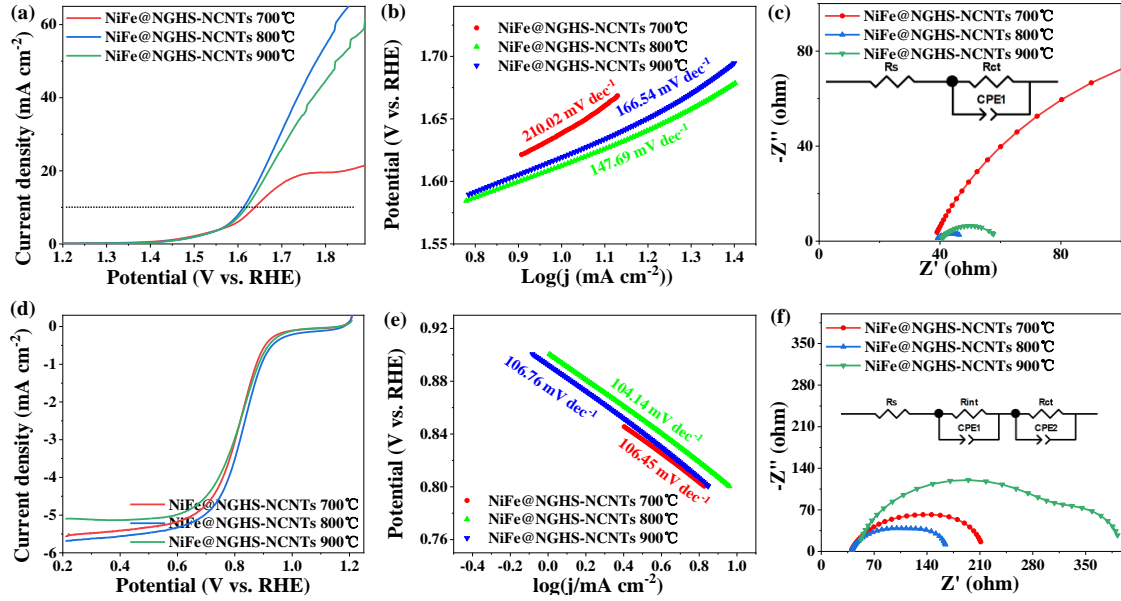

**Fig. S13.** OER performances: (a) OER polarization LSV curves, (b) Tafel curves, (c) EIS Nyquist plots. ORR performances: (d) ORR polarization LSV curves, (e) Tafel curves, (f) EIS Nyquist plots of NiFe@NGHS-NCNTs prepared at different calcination temperatures, maintaining other parameters such as intermetallic molar ratio of 1:3 (Ni:Fe) and alloy loading of 0.5 mmol.

**Table S1.** Summary of element contents in the as-prepared samples determined by XPS.

| Catalysts                            | C (at%) | N (at%) | Fe (at%) | Ni (at%) | O (at%) |
|--------------------------------------|---------|---------|----------|----------|---------|
| NiFe <sub>3</sub> @NGHS-NCNTs        | 85.87   | 10.09   | 0.38     | 0.21     | 3.45    |
| Fe@NGHS-NCNTs                        | 81.89   | 9.2     | 0.64     | -        | 8.28    |
| Ni@NGHS-NCNTs                        | 82.16   | 9.84    | -        | 0.64     | 7.36    |
| NGHS                                 | 88.81   | 8.87    | -        | -        | 2.32    |
| NiFe <sub>3</sub> @NGHS-NCNTs(thick) | 80.94   | 9.97    | 1.10     | 0.01     | 7.98    |

**Table S2.** Nitrogen species in the as-prepared samples determined by XPS using N 1s.

|                                      | Pyridinic-N         |             | Fe(Ni)N <sub>x</sub> |             | Pyrrolic-N          |             | Graphitic-N         |             | Oxidized-N          |             |
|--------------------------------------|---------------------|-------------|----------------------|-------------|---------------------|-------------|---------------------|-------------|---------------------|-------------|
|                                      | Binding energy (eV) | Content (%) | Binding energy (eV)  | Content (%) | Binding energy (eV) | Content (%) | Binding energy (eV) | Content (%) | Binding energy (eV) | Content (%) |
| NiFe <sub>3</sub> @NGHS-NCNTs        | 398.65              | 47.58       | 399.57               | 9.46        | 400.1               | 3.11        | 401.05              | 30.33       | 403.01              | 9.51        |
| Fe@NGHS-NCNTs                        | 398.45              | 46.04       | 399.57               | 7.70        | 400.1               | 13.0        | 401.0               | 20.34       | 402.92              | 12.91       |
| Ni@NGHS-NCNTs                        | 398.63              | 47.19       | 399.41               | 4.81        | 400.0               | 17.27       | 401.01              | 23.80       | 403.06              | 6.93        |
| NGHS                                 | 398.25              | 41.71       | -                    | -           | 399.85              | 10.59       | 400.93              | 36.59       | 403.03              | 11.10       |
| NiFe <sub>3</sub> @NGHS-NCNTs(thick) | 398.4               | 43.06       | 399.61               | 4.28        | 400.11              | 27.87       | 401.31              | 13.98       | 404.11              | 10.81       |



**Table S3.** Electrocatalytic properties of NiFe<sub>3</sub>@NGHS-NCNTs and recently reported transition metal-based catalysts for ORR and OER.

| Catalysts                                                                 | ORR                               |                                 | OER                              | $\Delta E$ (V<br>vs. RHE) | Reference |
|---------------------------------------------------------------------------|-----------------------------------|---------------------------------|----------------------------------|---------------------------|-----------|
|                                                                           | E <sub>onset</sub> (V<br>vs. RHE) | E <sub>1/2</sub> (V<br>vs. RHE) | E <sub>J=10</sub> (V<br>vs. RHE) |                           |           |
| NiFe <sub>3</sub> @NGHS-NCNTs                                             | 0.97                              | 0.823                           | 1.613                            | 0.791                     | This work |
| FeNi <sub>3</sub> N/NG                                                    | 0.88                              | 0.79                            | 1.64                             | 0.85                      | 3         |
| NiFe/N-CNT                                                                | -                                 | 0.75                            | 1.52                             | 0.77                      | 4         |
| Ni <sub>3</sub> Fe/N-C sheets                                             | 0.90                              | 0.78                            | 1.6                              | 0.82                      | 5         |
| Ni <sub>3</sub> FeN/NRGO                                                  | 1.38                              | 0.75                            | 1.63                             | 0.88                      | 6         |
| Ni <sub>3</sub> FeN microspheres                                          | -                                 | 0.78                            | 1.585                            | 0.805                     | 7         |
| FeNi-NC                                                                   | 0.98                              | 0.83                            | 1.61                             | 0.78                      | 8         |
| NiFe-ND/FeCo-NC                                                           | 0.93                              | 0.85                            | 1.66                             | 0.81                      | 9         |
| NiFe@N-CFs                                                                | 0.94                              | 0.82                            | 1.53                             | 0.71                      | 10        |
| nNiFe LDH/3D MPC                                                          | -                                 | 0.862                           | 1.57                             | 0.708                     | 11        |
| Fe <sub>1.2</sub> Co@NC/NCNTs                                             | 0.842                             | 0.821                           | 1.585                            | 0.765                     | 12        |
| FeCo <sub>2</sub> O <sub>4</sub> /hollow<br>graphene(HG)                  | 0.92                              | 0.82                            | 1.65                             | 0.83                      | 13        |
| CoFe <sub>2</sub> O <sub>4</sub> /CNTs                                    | 0.904                             | 0.75                            | 1.65                             | 0.9                       | 14        |
| FeCo@NC-750                                                               | 0.94                              | 0.8                             | 1.49                             | 0.69                      | 15        |
| CoFe/N-C                                                                  | 1.03                              | 0.821                           | 1.665                            | 0.844                     | 16        |
| CoFe@NCNTs                                                                | 0.95                              | 0.84                            | 1.68                             | 0.84                      | 17        |
| Ni <sub>x</sub> Co <sub>(3-x)</sub> O <sub>4</sub> /NH <sub>2</sub> -CNTs | 0.948                             | 0.851                           | 1.615                            | 0.764                     | 18        |
| NiCo/PFC                                                                  | 0.86                              | 0.79                            | 1.63                             | 0.84                      | 19        |
| NiCo <sub>2</sub> O <sub>4</sub>                                          | 0.93                              | 0.78                            | 1.62                             | 0.84                      | 20        |
| Fe <sub>x</sub> Ni <sub>y</sub> N@C/NC                                    | 0.98                              | 0.87                            | 1.53                             | 0.67                      | 21        |

**Table S4.** Summary of the impedance fitting data for catalysts during ORR process.

| Catalysts                            | Resistance( $\Omega$ ) |           |          | CPE1(mF)              |        | CPE2(mF) |        |
|--------------------------------------|------------------------|-----------|----------|-----------------------|--------|----------|--------|
|                                      | $R_s$                  | $R_{int}$ | $R_{ct}$ | CPE1-T                | CPE1-P | CPE2-T   | CPE2-P |
| NiFe <sub>3</sub> @NGHS-NCNTs        | 39.58                  | 93.24     | 33.84    | $2.02 \times 10^{-3}$ | 0.7993 | 0.0248   | 1.0940 |
| Fe@NGHS-NCNTs                        | 47.44                  | 77.88     | 54.13    | $3.12 \times 10^{-3}$ | 0.7671 | 0.0161   | 1.0580 |
| Ni@NGHS-NCNTs                        | 48.19                  | 54.81     | 182.40   | $1.62 \times 10^{-3}$ | 0.8059 | 0.0035   | 0.9929 |
| NGHS                                 | 41.18                  | 41.13     | 102.20   | $1.67 \times 10^{-3}$ | 0.8853 | 0.0186   | 0.9954 |
| NiFe <sub>3</sub> @NGHS-NCNTs(thick) | 49.26                  | 76.22     | 76.43    | $2.56 \times 10^{-3}$ | 0.8317 | 0.0114   | 0.9642 |
| Pt/C                                 | 39.88                  | 23.23     | 86.43    | $2.23 \times 10^{-3}$ | 0.8392 | 0.0038   | 0.9702 |

$R_s$  represents solution resistance in the electrolyte,  $R_{int}$  represents solid-electrolyte interface resistance,  $R_{ct}$  represents charge-transfer resistance and CPE represents constant phase elements.

**Table S5.** Summary of the impedance fitting data for catalysts during OER process.

| Catalysts                            | Resistance( $\Omega$ ) |          | CPE(mF)               |        |
|--------------------------------------|------------------------|----------|-----------------------|--------|
|                                      | $R_s$                  | $R_{ct}$ | CPE-T                 | CPE-P  |
| NiFe <sub>3</sub> @NGHS-NCNTs        | 38.18                  | 11.44    | $2.19 \times 10^{-4}$ | 0.6406 |
| Fe@NGHS-NCNTs                        | 38.44                  | 43.40    | $2.19 \times 10^{-3}$ | 0.7166 |
| Ni@NGHS-NCNTs                        | 38.19                  | 653.20   | $9.90 \times 10^{-6}$ | 0.9431 |
| NGHS                                 | 35.35                  | 117.20   | $1.45 \times 10^{-4}$ | 0.6563 |
| NiFe <sub>3</sub> @NGHS-NCNTs(thick) | 40.18                  | 242.20   | $1.48 \times 10^{-4}$ | 0.6165 |
| RuO <sub>2</sub>                     | 37.26                  | 31.75    | $2.77 \times 10^{-4}$ | 0.7945 |

**Table S6.** Bader charge distribution of the catalysts.

| <b>NiFe<sub>3</sub>@NC</b> |                     | <b>Fe@NC</b> |                     | <b>Ni@NC</b> |                     | <b>NC</b>    |                     | <b>NiFe<sub>3</sub>@NC</b> |                     |
|----------------------------|---------------------|--------------|---------------------|--------------|---------------------|--------------|---------------------|----------------------------|---------------------|
| <b>Atoms</b>               | <b>Bader charge</b> | <b>Atoms</b> | <b>Bader charge</b> | <b>Atoms</b> | <b>Bader charge</b> | <b>Atoms</b> | <b>Bader charge</b> | <b>Atoms</b>               | <b>Bader charge</b> |
| <b>C1</b>                  | 0.055               | <b>C1</b>    | -0.105              | <b>C1</b>    | -0.106              | <b>C1</b>    | -0.103              | <b>C1</b>                  | -0.078              |
| <b>C2</b>                  | -0.022              | <b>C2</b>    | 0.002               | <b>C2</b>    | 0.001               | <b>C2</b>    | 0.099               | <b>C2</b>                  | 0.062               |
| <b>C3</b>                  | 0.208               | <b>C3</b>    | 0.167               | <b>C3</b>    | 0.168               | <b>C3</b>    | 0.173               | <b>C3</b>                  | -0.085              |
| <b>C4</b>                  | -0.052              | <b>C4</b>    | -0.028              | <b>C4</b>    | -0.033              | <b>C4</b>    | 0.013               | <b>C4</b>                  | 0.058               |
| <b>C5</b>                  | 0.161               | <b>C5</b>    | 0.040               | <b>C5</b>    | 0.043               | <b>C5</b>    | 0.059               | <b>C5</b>                  | -0.021              |
| <b>C6</b>                  | -0.182              | <b>C6</b>    | -0.052              | <b>C6</b>    | -0.059              | <b>C6</b>    | -0.063              | <b>C6</b>                  | -0.049              |
| <b>C7</b>                  | 0.205               | <b>C7</b>    | 0.004               | <b>C7</b>    | 0.004               | <b>C7</b>    | 0.173               | <b>C7</b>                  | -0.097              |
| <b>C8</b>                  | -0.222              | <b>C8</b>    | -0.024              | <b>C8</b>    | -0.028              | <b>C8</b>    | -0.195              | <b>C8</b>                  | 0.003               |
| <b>C9</b>                  | 0.068               | <b>C9</b>    | 0.065               | <b>C9</b>    | 0.066               | <b>C9</b>    | 0.054               | <b>C9</b>                  | -0.074              |
| <b>C10</b>                 | 0.279               | <b>C10</b>   | 0.216               | <b>C10</b>   | 0.284               | <b>C10</b>   | 0.163               | <b>C10</b>                 | 0.292               |
| <b>C11</b>                 | -0.106              | <b>C11</b>   | -0.106              | <b>C11</b>   | -0.106              | <b>C11</b>   | -0.107              | <b>C11</b>                 | 0.026               |
| <b>C12</b>                 | 0.454               | <b>C12</b>   | 0.443               | <b>C12</b>   | 0.442               | <b>C12</b>   | 0.448               | <b>C12</b>                 | 0.421               |
| <b>C13</b>                 | -0.106              | <b>C13</b>   | -0.106              | <b>C13</b>   | -0.105              | <b>C13</b>   | -0.107              | <b>C13</b>                 | -0.075              |
| <b>C14</b>                 | -0.051              | <b>C14</b>   | 0.069               | <b>C14</b>   | 0.063               | <b>C14</b>   | 0.073               | <b>C14</b>                 | 0.036               |
| <b>C15</b>                 | 0.036               | <b>C15</b>   | 0.011               | <b>C15</b>   | 0.014               | <b>C15</b>   | -0.093              | <b>C15</b>                 | -0.061              |
| <b>C16</b>                 | 0.070               | <b>C16</b>   | 0.070               | <b>C16</b>   | 0.071               | <b>C16</b>   | 0.091               | <b>C16</b>                 | -0.055              |
| <b>C17</b>                 | 0.039               | <b>C17</b>   | -0.042              | <b>C17</b>   | -0.041              | <b>C17</b>   | -0.278              | <b>C17</b>                 | 0.053               |
| <b>C18</b>                 | 0.023               | <b>C18</b>   | 0.094               | <b>C18</b>   | 0.056               | <b>C18</b>   | 0.030               | <b>C18</b>                 | -0.085              |
| <b>C19</b>                 | 0.203               | <b>C19</b>   | 0.179               | <b>C19</b>   | 0.187               | <b>C19</b>   | 0.237               | <b>C19</b>                 | 0.033               |

|            |        |     |        |     |        |     |        |     |        |
|------------|--------|-----|--------|-----|--------|-----|--------|-----|--------|
| <b>C20</b> | -0.139 | C20 | -0.225 | C20 | -0.229 | C20 | -0.256 | C20 | -0.087 |
| <b>C21</b> | 0.205  | C21 | 0.236  | C21 | 0.171  | C21 | 0.320  | C21 | 0.130  |
| <b>C22</b> | -0.241 | C22 | -0.207 | C22 | -0.213 | C22 | -0.224 | C22 | 0.048  |
| <b>C23</b> | 0.282  | C23 | 0.146  | C23 | 0.290  | C23 | 0.163  | C23 | 0.290  |
| <b>C24</b> | 0.056  | C24 | 0.051  | C24 | 0.053  | C24 | 0.054  | C24 | -0.076 |
| <b>C25</b> | -0.011 | C25 | 0.094  | C25 | 0.095  | C25 | 0.092  | C25 | 0.091  |
| <b>C26</b> | 0.025  | C26 | -0.094 | C26 | -0.091 | C26 | -0.102 | C26 | 0.035  |
| <b>C27</b> | 0.147  | C27 | 0.145  | C27 | 0.146  | C27 | 0.092  | C27 | -0.055 |
| <b>C28</b> | 0.441  | C28 | 0.451  | C28 | 0.509  | C28 | 0.693  | C28 | 0.509  |
| <b>C29</b> | 0.332  | C29 | 0.436  | C29 | 0.449  | C29 | 0.552  | C29 | 0.270  |
| <b>C30</b> | 0.225  | C30 | 0.214  | C30 | 0.215  | C30 | 0.257  | C30 | 0.144  |
| <b>C31</b> | -0.161 | C31 | -0.229 | C31 | -0.225 | C31 | -0.256 | C31 | -0.203 |
| <b>C32</b> | 0.201  | C32 | 0.303  | C32 | 0.165  | C32 | 0.320  | C32 | 0.164  |
| <b>C33</b> | -0.219 | C33 | -0.050 | C33 | -0.151 | C33 | -0.195 | C33 | -0.025 |
| <b>C34</b> | 0.194  | C34 | 0.024  | C34 | 0.120  | C34 | 0.173  | C34 | -0.104 |
| <b>C35</b> | -0.052 | C35 | -0.040 | C35 | -0.041 | C35 | -0.016 | C35 | 0.007  |
| <b>C36</b> | 0.034  | C36 | -0.066 | C36 | -0.066 | C36 | -0.090 | C36 | 0.045  |
| <b>C37</b> | -0.055 | C37 | -0.049 | C37 | -0.051 | C37 | -0.069 | C37 | 0.068  |
| <b>C38</b> | 0.503  | C38 | 0.510  | C38 | 0.525  | C38 | 0.583  | C38 | 0.449  |
| <b>C39</b> | -0.196 | C39 | -0.183 | C39 | -0.194 | C39 | -0.023 | C39 | 0.051  |
| <b>C40</b> | 0.346  | C40 | 0.375  | C40 | 0.432  | C40 | 0.552  | C40 | 0.304  |
| <b>C41</b> | 0.037  | C41 | 0.111  | C41 | 0.111  | C41 | 0.030  | C41 | -0.069 |
| <b>C42</b> | 0.207  | C42 | 0.049  | C42 | 0.052  | C42 | 0.237  | C42 | 0.149  |
| <b>C43</b> | -0.172 | C43 | 0.071  | C43 | 0.066  | C43 | -0.063 | C43 | -0.060 |
| <b>C44</b> | 0.165  | C44 | -0.086 | C44 | -0.081 | C44 | 0.059  | C44 | -0.021 |

|            |        |     |        |     |        |     |        |     |        |
|------------|--------|-----|--------|-----|--------|-----|--------|-----|--------|
| <b>C45</b> | 0.052  | C45 | 0.225  | C45 | 0.220  | C45 | 0.071  | C45 | -0.015 |
| <b>C46</b> | 0.419  | C46 | 0.315  | C46 | 0.322  | C46 | 0.419  | C46 | 0.296  |
| <b>C47</b> | 0.211  | C47 | 0.211  | C47 | 0.210  | C47 | 0.104  | C47 | -0.041 |
| <b>C48</b> | -0.162 | C48 | -0.064 | C48 | -0.065 | C48 | -0.069 | C48 | 0.072  |
| <b>C49</b> | 0.498  | C49 | 0.495  | C49 | 0.517  | C49 | 0.583  | C49 | 0.475  |
| <b>C50</b> | 0.129  | C50 | 0.129  | C50 | 0.129  | C50 | 0.092  | C50 | -0.058 |
| <b>C51</b> | 0.437  | C51 | 0.443  | C51 | 0.467  | C51 | 0.693  | C51 | 0.397  |
| <b>C52</b> | -0.078 | C52 | 0.060  | C52 | 0.058  | C52 | 0.091  | C52 | -0.060 |
| <b>C53</b> | 0.020  | C53 | -0.054 | C53 | -0.052 | C53 | -0.278 | C53 | -0.077 |
| <b>C54</b> | -0.032 | C54 | -0.009 | C54 | -0.013 | C54 | 0.013  | C54 | 0.053  |
| <b>C55</b> | 0.208  | C55 | 0.167  | C55 | 0.169  | C55 | 0.173  | C55 | -0.077 |
| <b>C56</b> | -0.212 | C56 | -0.178 | C56 | -0.179 | C56 | -0.173 | C56 | 0.060  |
| <b>C57</b> | 0.063  | C57 | 0.078  | C57 | 0.080  | C57 | 0.071  | C57 | 0.591  |
| <b>C58</b> | 0.053  | C58 | 0.079  | C58 | 0.079  | C58 | 0.071  | C58 | -0.014 |
| <b>C59</b> | 0.404  | C59 | 0.398  | C59 | 0.402  | C59 | 0.419  | C59 | 0.299  |
| <b>C60</b> | -0.034 | C60 | -0.020 | C60 | -0.024 | C60 | -0.016 | C60 | 0.012  |
| <b>C61</b> | 0.032  | C61 | -0.064 | C61 | -0.062 | C61 | -0.090 | C61 | 0.053  |
| <b>C62</b> | 0.092  | C62 | 0.094  | C62 | 0.095  | C62 | 0.092  | C62 | 0.089  |
| <b>C63</b> | 0.041  | C63 | -0.086 | C63 | -0.085 | C63 | -0.102 | C63 | 0.019  |
| <b>C64</b> | -0.065 | C64 | 0.067  | C64 | 0.062  | C64 | 0.073  | C64 | 0.044  |
| <b>C65</b> | 0.184  | C65 | -0.088 | C65 | -0.086 | C65 | -0.093 | C65 | -0.050 |
| <b>C66</b> | -0.196 | C66 | 0.100  | C66 | 0.099  | C66 | 0.099  | C66 | -0.029 |
| <b>N1</b>  | -1.141 | N1  | -1.137 | N1  | -1.144 | N1  | -1.148 | N1  | -1.139 |
| <b>N2</b>  | -1.193 | N2  | -1.200 | N2  | -1.207 | N2  | -1.183 | N2  | -1.147 |
| <b>N3</b>  | -1.168 | N3  | -1.141 | N3  | -1.171 | N3  | -1.014 | N3  | -1.151 |

|            |        |     |        |     |        |    |        |      |        |
|------------|--------|-----|--------|-----|--------|----|--------|------|--------|
| <b>N4</b>  | -1.203 | N4  | -1.201 | N4  | -1.204 | N4 | -1.188 | N4   | -1.199 |
| <b>N5</b>  | -1.248 | N5  | -1.173 | N5  | -1.176 | N5 | -1.254 | N5   | -1.127 |
| <b>Fe1</b> | 0.112  | Fe1 | 0.024  | Ni1 | 0.012  |    |        | Fe1  | 0.003  |
| <b>Fe2</b> | 0.108  | Fe2 | 0.044  | Ni2 | 0.009  |    |        | Fe2  | 0.630  |
| <b>Fe3</b> | 0.658  | Fe3 | 0.585  | Ni3 | 0.554  |    |        | Fe3  | 0.099  |
| <b>Ni1</b> | -0.203 | Fe4 | 0.019  | Ni4 | 0.005  |    |        | Fe4  | 0.094  |
|            |        |     |        |     |        |    |        | Fe5  | 0.000  |
|            |        |     |        |     |        |    |        | Fe6  | 0.027  |
|            |        |     |        |     |        |    |        | Fe7  | 0.146  |
|            |        |     |        |     |        |    |        | Fe8  | 0.348  |
|            |        |     |        |     |        |    |        | Fe9  | 0.147  |
|            |        |     |        |     |        |    |        | Fe10 | 0.020  |
|            |        |     |        |     |        |    |        | Fe11 | 0.355  |
|            |        |     |        |     |        |    |        | Fe12 | 0.125  |
|            |        |     |        |     |        |    |        | Ni1  | -0.047 |
|            |        |     |        |     |        |    |        | Ni2  | -0.240 |
|            |        |     |        |     |        |    |        | Ni3  | -0.310 |
|            |        |     |        |     |        |    |        | Ni4  | -0.029 |

**Table S7.** Comparison of liquid and solid Zn-air performances of the NiFe<sub>3</sub>@NGHS-NCNTs catalyst with recently reported advanced catalysts.

| References | Catalysts                                | liquid Zn-air battery                   |                                              | solid Zn-air battery        |                                         |
|------------|------------------------------------------|-----------------------------------------|----------------------------------------------|-----------------------------|-----------------------------------------|
|            |                                          | power density<br>(mW cm <sup>-2</sup> ) | specific capacity<br>(mA h g <sup>-1</sup> ) | open-circuit voltage<br>(V) | power density<br>(mW cm <sup>-2</sup> ) |
| This work  | NiFe <sub>3</sub> @NGHS-NCNTs            | 126.54                                  | 808.7 (200 mA cm <sup>-2</sup> )             | 1.44                        | 102.82                                  |
| 3          | FeNi <sub>3</sub> N/NG                   | 115.3                                   | 785.2 (10 mA cm <sup>-2</sup> )              | 1.463                       | -                                       |
| 10         | NiFe@N-CFs                               | 102                                     | 719 (5 mA cm <sup>-2</sup> )                 | -                           | -                                       |
| 22         | NPC/FeCo@NCNT                            | 151.3                                   | 810 (200 mA cm <sup>-2</sup> )               | 1.45                        | 65.0                                    |
| 23         | NGM-Co                                   | 152                                     | 750 (20 mA cm <sup>-2</sup> )                | 1.439                       | -                                       |
| 24         | CoN <sub>4</sub> /NG                     | -                                       | 730 (100 mA cm <sup>-2</sup> )               | -                           | 28                                      |
| 25         | CoS <sub>x</sub> /CoNC-800               | 103                                     | 734.2 (40 mA cm <sup>-2</sup> )              | 1.34                        | -                                       |
| 26         | o-CC-H <sub>2</sub>                      | 91.4                                    | 707 (20 mA cm <sup>-2</sup> )                | 1.258                       | -                                       |
| 27         | Fe-Co <sub>4</sub> N@NC                  | 105                                     | 806 (5 mA cm <sup>-2</sup> )                 | 1.34                        | 72                                      |
| 28         | (Zn,Co)/NSC                              | 150                                     | -                                            | 1.56                        | 15                                      |
| 29         | IOSHs-NSC                                | 133                                     | 768 (10 mA cm <sup>-2</sup> )                | 1.408                       | 60                                      |
| 30         | NGCNT/FeCo                               | 89.3                                    | 653.2 (100 mA cm <sup>-2</sup> )             | 1.249                       | 97.8                                    |
| 31         | Co <sub>9</sub> S <sub>8</sub> /MnS-USNC | 146.77                                  | -                                            | 1.34                        | 79                                      |

## References

1. Q. Shen, Z. Jiang, X. Tian, H. Zhu and Z.-J. Jiang, *J. Alloy. Compd.*, 2021, **884**, 161073.
2. I. S. Amiin, Z. Pu, X. Liu, K. A. Owusu, H. G. R. Monestel, F. O. Boakye, H. Zhang and S. Mu, *Adv. Funct. Mater.*, 2017, **27**, 1702300.
3. L. Liu, F. Yan, K. Li, C. Zhu, Y. Xie, X. Zhang and Y. Chen, *J. Mater. Chem. A*, 2019, **7**, 1083-1091.
4. H. Lei, Z. Wang, F. Yang, X. Huang, J. Liu, Y. Liang, J. Xie, M. S. Javed, X. Lu, S. Tan and W. Mai, *Nano Energy*, 2020, **68**, 104293.
5. G. Fu, Z. Cui, Y. Chen, Y. Li, Y. Tang and J. B. Goodenough, *Adv. Energy Mater.*, 2017, **7**, 1601172.
6. Y. Fan, S. Ida, A. Staykov, T. Akbay, H. Hagiwara, J. Matsuda, K. Kaneko and T. Ishihara, *Small*, 2017, **13**, 1700099.
7. G. Fu, Z. Cui, Y. Chen, L. Xu, Y. Tang and J. B. Goodenough, *Nano Energy*, 2017, **39**, 77-85.
8. L. Yang, X. Zeng, D. Wang and D. Cao, *Energy Storage Mater.*, 2018, **12**, 277-283.
9. Y. Wang, G. Zhang, M. Ma, Y. Ma, J. Huang, C. Chen, Y. Zhang, X. Sun and Z. Yan, *Sci. China Mater.*, 2020, **63**, 1182-1195.
10. Y. Niu, X. Teng, S. Gong and Z. Chen, *J. Mater. Chem. A*, 2020, **8**, 13725-13734.
11. W. Wang, Y. Liu, J. Li, J. Luo, L. Fu and S. Chen, *J. Mater. Chem. A*, 2018, **6**, 14299-14306.
12. S. Li, W. Chen, H. Pan, Y. Cao, Z. Jiang, X. Tian, X. Hao, T. Maiyalagan and Z.-J. Jiang, *ACS Sustain. Chem. Eng.*, 2019, **7**, 8530-8541.
13. W. Yan, Z. Yang, W. Bian and R. Yang, *Carbon*, 2015, **92**, 74-83.
14. X. Zhang, H. Xu, X. Li, Y. Li, T. Yang and Y. Liang, *ACS Catalysis*, 2016, **6**, 580-588.
15. P. Cai, S. Ci, E. Zhang, P. Shao, C. Cao and Z. Wen, *Electrochim. Acta*, 2016, **220**, 354-362.



16. T. An, X. Ge, N. N. Tham, A. Sumboja, Z. Liu and Y. Zong, *ACS Sustain. Chem. Eng.*, 2018, **6**, 7743-7751.
17. P. Cai, Y. Hong, S. Ci and Z. Wen, *Nanoscale*, 2016, **8**, 20048-20055.
18. B. Chen, Z. Jiang, J. Huang, B. Deng, L. Zhou, Z.-J. Jiang and M. Liu, *J. Mater. Chem. A*, 2018, **6**, 9517-9527.
19. G. Fu, Y. Chen, Z. Cui, Y. Li, W. Zhou, S. Xin, Y. Tang and J. B. Goodenough, *Nano Lett.*, 2016, **16**, 6516-6522.
20. M. Prabu, K. Ketpang and S. Shanmugam, *Nanoscale*, 2014, **6**, 3173-3181.
21. M. Wu, G. Zhang, Y. Hu, J. Wang, T. Sun, T. Regier, J. Qiao and S. Sun, *Carbon Energy*, 2020, **3**, 176-187.
22. X. Hao, Z. Jiang, B. Zhang, X. Tian, C. Song, L. Wang, T. Maiyalagan, X. Hao and Z. J. Jiang, *Adv. Sci.*, 2021, **8**, 2004572.
23. C. Tang, B. Wang, H. F. Wang and Q. Zhang, *Adv. Mater.*, 2017, **29**, 1703185.
24. L. Yang, L. Shi, D. Wang, Y. Lv and D. Cao, *Nano Energy*, 2018, **50**, 691-698.
25. Q. Lu, J. Yu, X. Zou, K. Liao, P. Tan, W. Zhou, M. Ni and Z. Shao, *Adv. Funct. Mater.*, 2019, **29**, 1904481.
26. H.-F. Wang, C. Tang, B. Wang, B.-Q. Li, X. Cui and Q. Zhang, *Energy Storage Mater.*, 2018, **15**, 124-130.
27. Q. Xu, H. Jiang, Y. Li, D. Liang, Y. Hu and C. Li, *Appl. Catal. B-Environ.*, 2019, **256**, 117893.
28. C. Li, M. Wu and R. Liu, *Appl. Catal., B*, 2019, **244**, 150-158.
29. K. Tang, C. Yuan, Y. Xiong, H. Hu and M. Wu, *Appl. Catal. B-Environ.*, 2020, **260**, 118209.
30. C.-Y. Su, H. Cheng, W. Li, Z.-Q. Liu, N. Li, Z. Hou, F.-Q. Bai, H.-X. Zhang and T.-Y. Ma, *Adv. Energy Mater.*, 2017, **7**, 1602420.
31. J. Li, W. Li, H. Mi, Y. Li, L. Deng, Q. Zhang, C. He and X. Ren, *J. Mater. Chem. A*, 2021, **9**, 22635-22642.
